# Supplementary material for: Tetraalkylammonium-based dicationic ionic liquids (ILs) for CO2 capture
Source: Royal Society of Chemistry journal article supplement (doi:10.1039/d3nj01552a), 2023-01-01
Supplement: d3nj01552a1.pdf [file d3nj01552a1.pdf]

## **Supporting Information**

# Tetraalkylammonium based Dicationic Ionic Liquid (IL) for CO<sub>2</sub> Capture

Prashant S. Kulkarni<sup>1\*</sup>, Prathamesh Ranjane<sup>1</sup>, Karun Mishra<sup>1</sup>, Swati Sundararajan<sup>1</sup> and Sanjay Kamble<sup>2</sup>

<sup>1</sup>Energy and Environment Laboratory, Department of Applied Chemistry, Defence Institute of Advanced Technology, Deemed University, Girinagar, Pune- 411 025, India

<sup>2</sup>Chemical Engineering and Process Development Laboratory, National Chemical Laboratory, Dr. Homi Bhabha Road, Pune 411008, India

\* **Corresponding author:** Dr. Prashant S. Kulkarni, Phone: +91-02024604462,  
e-mail: [ps\\_kulkarni@rediffmail.com](mailto:ps_kulkarni@rediffmail.com) & [pskulkarni@diat.ac.in](mailto:pskulkarni@diat.ac.in)

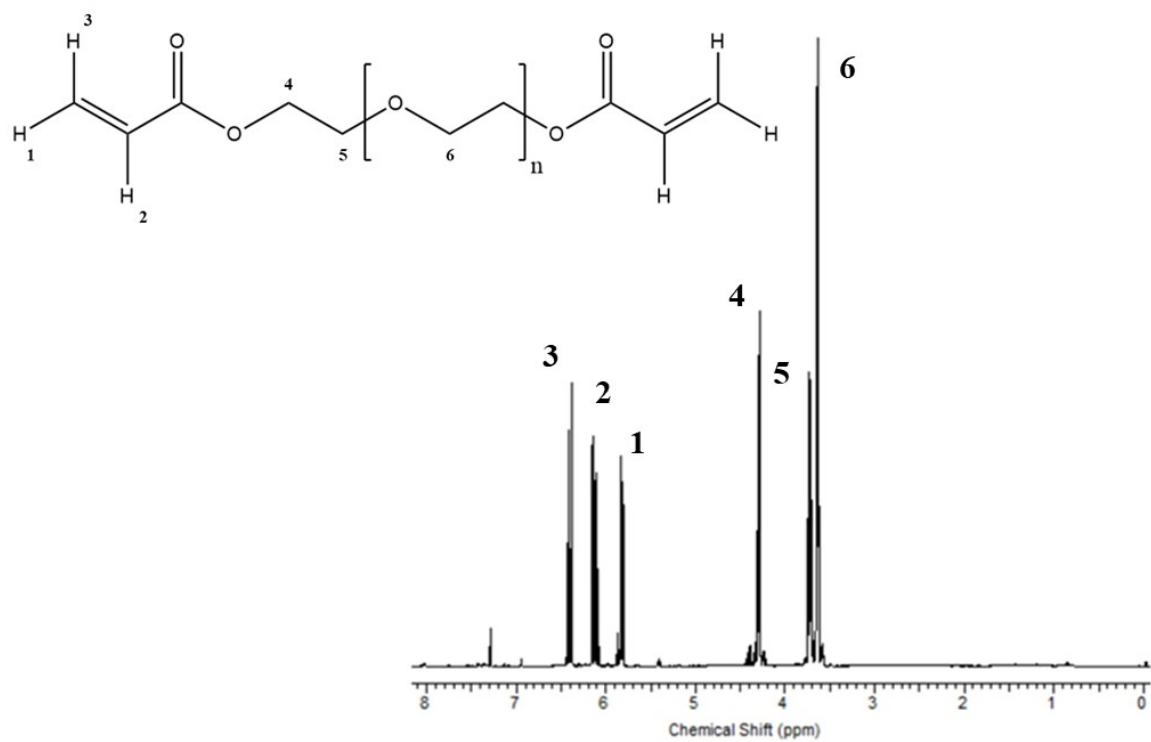

**Figure S1:** <sup>1</sup>H NMR spectra of PEGDA.

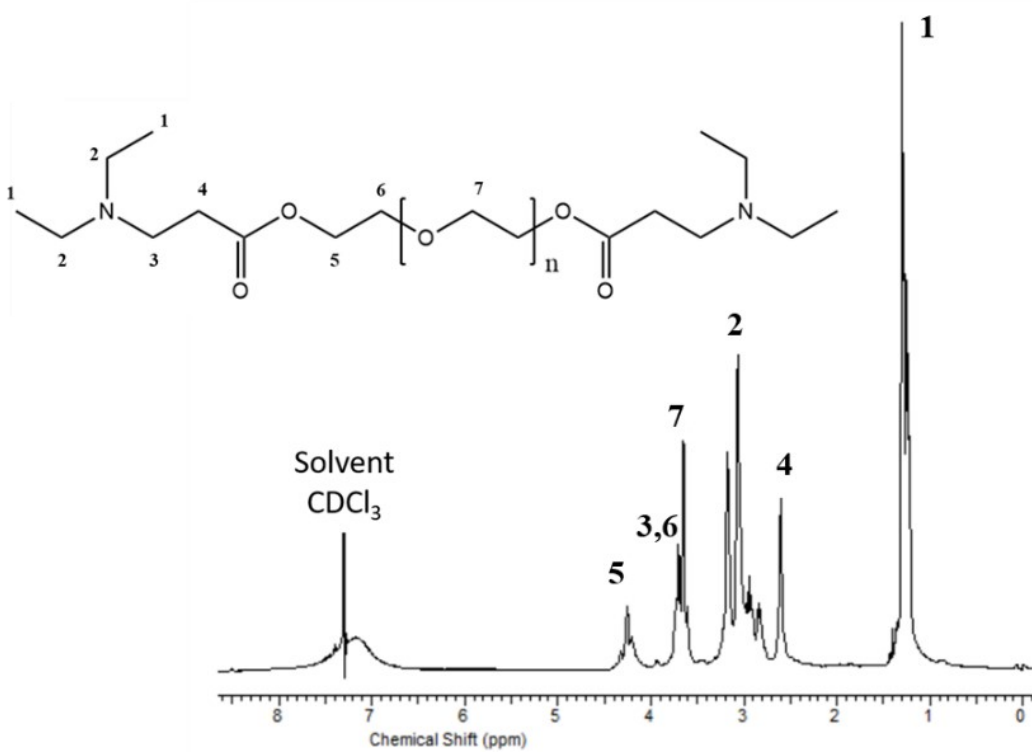

**Figure S2:** <sup>1</sup>H NMR spectra of PEGDA-DEA product (PD).

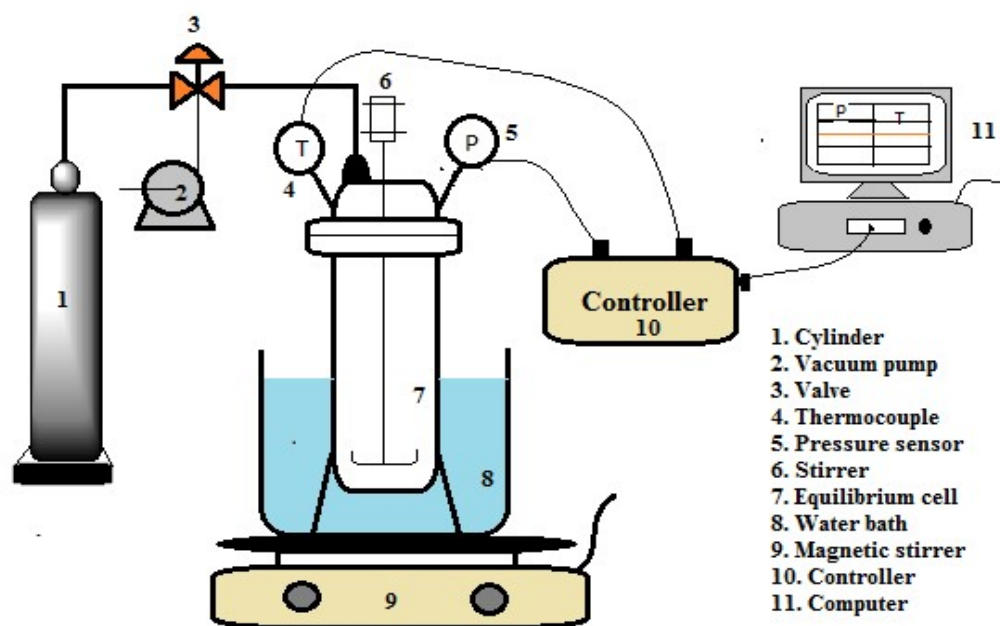

**Figure S3:** Schematic representation of fabricated CO<sub>2</sub> absorption apparatus.

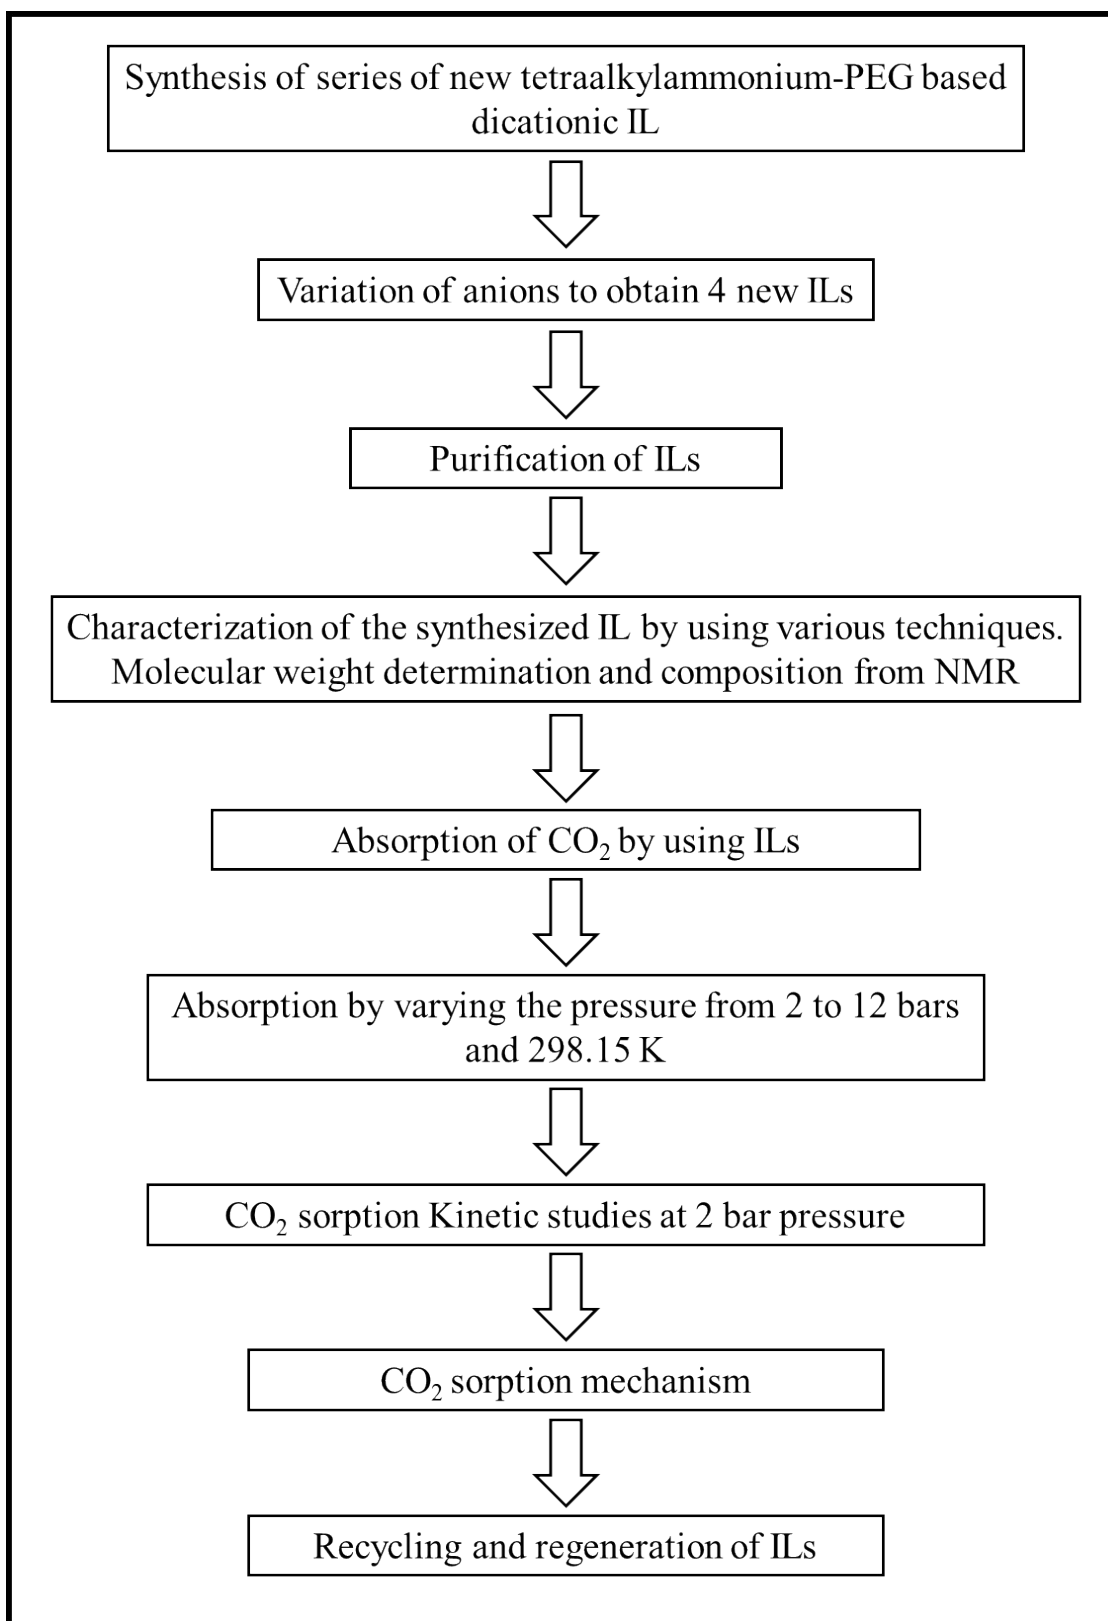

**Figure S4:** Flowchart - absorption of CO<sub>2</sub> by using tetraalkylammonium dicationic IL.

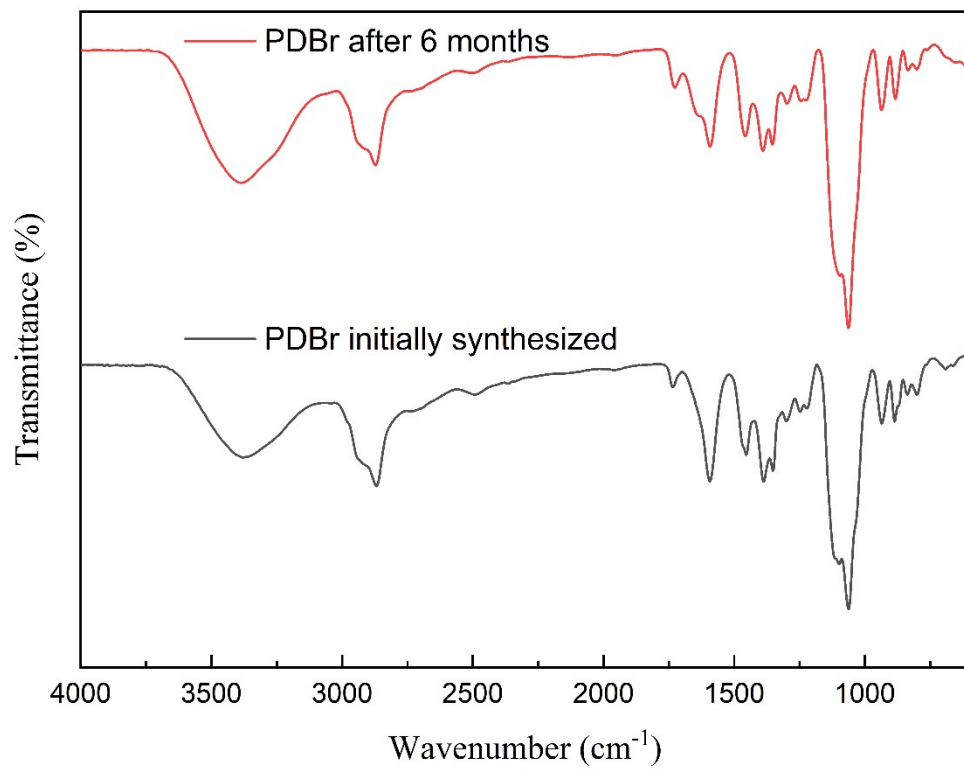

**Figure S5:** Chemical stability of PDBr IL after 6 months, as investigated by FTIR.

**Table S1:** Design of experiment with input parameters and operating conditions.

| Ionic Liquid (IL)  | Operating Conditions |               |                                         |                                                                    |                                                    | Outcomes   |                             |
|--------------------|----------------------|---------------|-----------------------------------------|--------------------------------------------------------------------|----------------------------------------------------|------------|-----------------------------|
|                    | Pressure bar         | Temperature K | Molecular Weight (g.mol <sup>-1</sup> ) | Viscosity (mm <sup>2</sup> .s <sup>-1</sup> ) (1 bar and 298.15 K) | Density (g.cm <sup>-3</sup> ) (1 bar and 298.15 K) | $x_{CO_2}$ | mol CO <sub>2</sub> /mol IL |
| PDBF <sub>4</sub>  | 2                    | 298.15        | 764.48                                  | 198.40                                                             | 1.09                                               | 0.128      | 0.147                       |
|                    | 4                    |               |                                         |                                                                    |                                                    | 0.193      | 0.239                       |
|                    | 6                    |               |                                         |                                                                    |                                                    | 0.222      | 0.287                       |
|                    | 8                    |               |                                         |                                                                    |                                                    | 0.368      | 0.584                       |
|                    | 10                   |               |                                         |                                                                    |                                                    | 0.559      | 1.273                       |
|                    | 12                   |               |                                         |                                                                    |                                                    | 0.577      | 1.365                       |
| PDNTf <sub>2</sub> | 2                    | 298.15        | 1151.17                                 | 84.74                                                              | 1.40                                               | 0.095      | 0.105                       |
|                    | 4                    |               |                                         |                                                                    |                                                    | 0.211      | 0.268                       |
|                    | 6                    |               |                                         |                                                                    |                                                    | 0.334      | 0.502                       |
|                    | 8                    |               |                                         |                                                                    |                                                    | 0.385      | 0.626                       |
|                    | 10                   |               |                                         |                                                                    |                                                    | 0.443      | 0.797                       |
|                    | 12                   |               |                                         |                                                                    |                                                    | 0.471      | 0.892                       |
| PDPF <sub>6</sub>  | 2                    | 298.15        | 880.80                                  | 44.66                                                              | 1.29                                               | 0.167      | 0.201                       |
|                    | 4                    |               |                                         |                                                                    |                                                    | 0.181      | 0.222                       |
|                    | 6                    |               |                                         |                                                                    |                                                    | 0.227      | 0.294                       |
|                    | 8                    |               |                                         |                                                                    |                                                    | 0.283      | 0.396                       |
|                    | 10                   |               |                                         |                                                                    |                                                    | 0.421      | 0.727                       |
|                    | 12                   |               |                                         |                                                                    |                                                    | 0.459      | 0.849                       |
| PDBr               | 2                    | 298.15        | 750.67                                  | 80.33                                                              | 1.23                                               | 0.039      | 0.041                       |
|                    | 4                    |               |                                         |                                                                    |                                                    | 0.160      | 0.191                       |
|                    | 6                    |               |                                         |                                                                    |                                                    | 0.232      | 0.303                       |
|                    | 8                    |               |                                         |                                                                    |                                                    | 0.243      | 0.321                       |
|                    | 10                   |               |                                         |                                                                    |                                                    | 0.334      | 0.503                       |
|                    | 12                   |               |                                         |                                                                    |                                                    | 0.362      | 0.568                       |
